# Supplementary material
Source: publisher figshare collection journal article supplement (https://karger.figshare.com/articles/dataset/_/5122567)

Percent Identity

|    | 1  | 2     | 3     | 4     | 5     | 6     | 7     | 8    | 9    | 10   | 11   | 12   | 13   | 14   | 15   | 16   | 17   | 18   | 19   | 20   | 21    | 22   | 23   | 24   | 25   | 26   |      |         |         |
|----|----|-------|-------|-------|-------|-------|-------|------|------|------|------|------|------|------|------|------|------|------|------|------|-------|------|------|------|------|------|------|---------|---------|
| 1  | 1  | 38.3  | 46.5  | 26.4  | 25.0  | 13.2  | 60.5  | 55.6 | 54.4 | 44.6 | 46.7 | 36.7 | 39.5 | 45.7 | 49.4 | 51.2 | 49.4 | 47.6 | 45.6 | 27.5 | 51.8  | 51.3 | 48.7 | 54.3 | 37.3 | 25.8 | 1    | CeSoxJ  |         |
| 2  | 2  | 107.5 | 65.7  | 33.3  | 48.3  | 19.2  | 97.4  | 88.9 | 88.6 | 57.8 | 53.3 | 42.9 | 48.8 | 50.6 | 55.2 | 53.5 | 51.7 | 53.6 | 58.2 | 35.0 | 83.5  | 56.4 | 53.8 | 86.4 | 50.6 | 40.0 | 2    | HsSox1  |         |
| 3  | 3  | 82.8  | 42.1  | 33.3  | 53.5  | 25.3  | 77.6  | 75.3 | 75.9 | 62.7 | 54.7 | 42.9 | 47.7 | 56.8 | 56.3 | 58.1 | 56.2 | 58.3 | 59.5 | 44.4 | 71.8  | 59.0 | 57.7 | 76.5 | 48.2 | 52.5 | 3    | HsSox15 |         |
| 4  | 4  | 131.6 | 143.8 | 124.3 |       | 32.2  | 8.1   | 48.7 | 46.9 | 44.3 | 41.0 | 41.3 | 33.7 | 39.5 | 42.0 | 44.8 | 43.0 | 41.6 | 44.0 | 41.8 | 24.6  | 45.9 | 41.0 | 41.0 | 48.1 | 33.7 | 28.0 | 4       | HsSox30 |
| 5  | 5  | 146.3 | 71.4  | 59.5  | 139.7 |       | 21.7  | 69.7 | 65.4 | 70.9 | 50.6 | 52.0 | 41.8 | 46.5 | 49.4 | 46.0 | 45.3 | 43.8 | 46.4 | 51.9 | 30.3  | 61.2 | 51.3 | 50.0 | 65.4 | 49.4 | 32.9 | 5       | HsSRY   |
| 6  | 6  | 258.0 | 227.0 | 196.1 | 273.0 | 287.0 |       | 28.9 | 27.2 | 27.8 | 27.7 | 32.0 | 29.6 | 27.9 | 30.9 | 26.4 | 26.7 | 25.8 | 27.4 | 29.1 | 17.6  | 28.2 | 29.5 | 29.5 | 27.2 | 26.5 | 14.3 | 6       | NcMATA1 |
| 7  | 7  | 55.5  | 2.7   | 26.6  | 83.4  | 38.7  | 176.3 |      | 94.7 | 93.4 | 60.5 | 53.3 | 53.9 | 52.6 | 53.9 | 63.2 | 60.5 | 60.5 | 59.2 | 60.5 | 53.9  | 89.5 | 57.9 | 55.3 | 92.1 | 55.3 | 60.5 | 7       | OISox1a |
| 8  | 8  | 58.2  | 6.8   | 28.6  | 81.6  | 46.1  | 190.0 | 5.5  |      | 91.1 | 60.5 | 52.0 | 50.6 | 49.4 | 53.1 | 63.0 | 59.3 | 60.5 | 59.3 | 60.8 | 50.6  | 87.7 | 59.0 | 55.1 | 88.9 | 50.6 | 58.0 | 8       | OISox2  |
| 9  | 9  | 63.9  | 9.7   | 29.0  | 92.9  | 36.8  | 184.5 | 6.9  | 9.5  |      | 62.0 | 53.3 | 49.4 | 48.1 | 54.4 | 60.8 | 59.5 | 59.5 | 58.2 | 60.8 | 49.4  | 84.8 | 57.7 | 53.8 | 87.3 | 50.6 | 58.2 | 9       | OISox3  |
| 10 | 10 | 92.2  | 59.6  | 50.7  | 101.9 | 78.3  | 175.7 | 55.5 | 51.0 | 51.0 |      | 57.3 | 53.0 | 54.2 | 58.0 | 57.8 | 56.6 | 56.6 | 61.4 | 89.9 | 55.4  | 63.9 | 59.0 | 56.4 | 63.0 | 44.6 | 55.4 | 10      | OISox4  |
| 11 | 11 | 87.4  | 71.4  | 68.2  | 106.6 | 74.7  | 148.1 | 69.7 | 74.7 | 71.4 | 62.2 |      | 93.3 | 92.0 | 58.7 | 50.7 | 52.0 | 52.0 | 53.3 | 60.0 | 88.0  | 57.3 | 58.7 | 56.0 | 53.3 | 50.7 | 45.3 | 11      | OISox5  |
| 12 | 12 | 85.2  | 73.3  | 78.2  | 96.5  | 83.2  | 184.9 | 69.9 | 78.2 | 81.6 | 65.8 | 7.0  |      | 93.0 | 54.3 | 43.7 | 44.2 | 43.8 | 46.4 | 55.7 | 71.4  | 51.8 | 59.0 | 55.1 | 50.6 | 49.4 | 36.7 | 12      | OISox6A |
| 13 | 13 | 94.7  | 71.8  | 83.2  | 94.3  | 88.3  | 166.0 | 73.1 | 81.5 | 85.1 | 64.6 | 8.5  | 6.1  |      | 53.1 | 43.0 | 44.2 | 43.0 | 48.8 | 54.4 | 81.4  | 50.6 | 55.1 | 55.1 | 49.4 | 45.8 | 43.0 | 13      | OISox6B |
| 14 | 14 | 83.4  | 71.6  | 61.8  | 97.0  | 81.5  | 162.3 | 69.9 | 72.0 | 68.8 | 56.0 | 59.3 | 69.0 | 72.0 |      | 61.7 | 63.0 | 63.0 | 61.7 | 58.2 | 51.9  | 55.6 | 88.5 | 84.6 | 51.9 | 65.4 | 48.1 | 14      | OISox7  |
| 15 | 15 | 79.9  | 59.6  | 54.0  | 87.9  | 91.3  | 168.3 | 50.3 | 44.7 | 51.9 | 59.6 | 78.1 | 79.9 | 85.1 | 47.0 |      | 90.7 | 93.1 | 86.9 | 58.2 | 43.7  | 60.0 | 66.7 | 64.1 | 65.4 | 51.8 | 48.3 | 15      | OISox8  |
| 16 | 16 | 69.0  | 64.9  | 53.7  | 90.2  | 93.2  | 174.2 | 55.5 | 58.1 | 57.6 | 63.7 | 74.7 | 86.6 | 88.3 | 50.7 | 5.1  |      | 95.3 | 89.3 | 57.0 | 44.2  | 57.6 | 67.9 | 64.1 | 63.0 | 50.6 | 48.8 | 16      | OISox9a |
| 17 | 17 | 76.8  | 64.9  | 54.6  | 94.8  | 98.1  | 181.4 | 55.5 | 52.5 | 57.6 | 63.7 | 74.7 | 79.9 | 88.5 | 47.7 | 7.2  | 2.4  |      | 88.1 | 57.0 | 43.8  | 57.6 | 69.2 | 64.1 | 63.0 | 51.8 | 48.3 | 17      | OISox9B |
| 18 | 18 | 79.9  | 66.2  | 58.6  | 88.5  | 89.9  | 178.2 | 58.2 | 56.6 | 60.3 | 52.2 | 71.4 | 81.5 | 76.7 | 51.6 | 10.6 | 11.6 | 11.7 |      | 59.5 | 45.2  | 59.5 | 62.8 | 61.5 | 64.2 | 50.6 | 51.2 | 18      | OISox10 |
| 19 | 19 | 87.2  | 57.1  | 57.6  | 97.0  | 74.9  | 165.7 | 55.5 | 55.0 | 55.0 | 9.6  | 56.6 | 63.0 | 65.8 | 60.3 | 57.1 | 63.0 | 63.0 | 57.6 |      | 57.0  | 62.0 | 60.3 | 56.4 | 62.0 | 49.4 | 51.9 | 19      | OISox11 |
| 20 | 20 | 169.5 | 116.2 | 93.5  | 156.9 | 165.2 | 240.0 | 69.9 | 73.3 | 79.9 | 66.5 | 13.1 | 13.7 | 15.0 | 70.1 | 91.3 | 88.3 | 89.4 | 86.6 | 58.7 |       | 52.9 | 56.4 | 53.8 | 50.6 | 49.4 | 28.9 | 20      | OISox13 |
| 21 | 21 | 67.4  | 13.5  | 32.7  | 84.9  | 54.2  | 180.7 | 11.4 | 13.5 | 17.0 | 47.6 | 62.2 | 73.6 | 78.3 | 66.2 | 50.7 | 61.5 | 58.6 | 57.5 | 52.5 | 70.6  |      | 57.7 | 55.1 | 93.8 | 49.4 | 56.5 | 21      | OISox14 |
| 22 | 22 | 73.1  | 62.6  | 58.7  | 105.8 | 76.5  | 172.1 | 61.0 | 58.7 | 61.4 | 58.7 | 59.3 | 58.7 | 67.1 | 12.6 | 42.4 | 41.7 | 39.5 | 51.0 | 56.0 | 64.2  | 61.4 |      | 85.9 | 56.4 | 66.7 | 50.0 | 22      | OISox17 |
| 23 | 23 | 79.9  | 68.5  | 61.4  | 105.8 | 79.9  | 172.1 | 66.8 | 67.1 | 70.1 | 64.2 | 65.1 | 67.1 | 67.1 | 17.3 | 47.0 | 48.6 | 48.6 | 53.5 | 64.2 | 70.1  | 67.1 | 15.7 |      | 53.8 | 65.4 | 51.3 | 23      | OISox18 |
| 24 | 24 | 61.0  | 9.7   | 26.8  | 78.1  | 46.1  | 190.0 | 8.4  | 12.1 | 13.9 | 46.2 | 71.4 | 78.2 | 81.5 | 75.0 | 40.2 | 50.7 | 47.7 | 46.9 | 52.5 | 73.3  | 6.5  | 64.2 | 70.1 |      | 49.4 | 56.8 | 24      | OISox21 |
| 25 | 25 | 108.5 | 68.5  | 79.9  | 126.4 | 78.2  | 195.6 | 66.8 | 78.2 | 78.2 | 87.0 | 78.1 | 81.5 | 91.9 | 46.1 | 65.5 | 75.0 | 68.8 | 73.4 | 81.6 | 73.3  | 78.2 | 43.9 | 46.2 | 81.5 |      | 41.0 | 25      | OISox32 |
| 26 | 26 | 167.4 | 99.7  | 64.6  | 168.3 | 142.1 | 305.0 | 55.5 | 54.5 | 57.1 | 64.9 | 93.3 | 94.7 | 92.5 | 78.1 | 84.6 | 76.7 | 81.4 | 72.0 | 71.6 | 143.4 | 58.1 | 78.1 | 74.8 | 57.1 | 97.0 |      | 26      | XISox31 |

Divergence

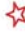

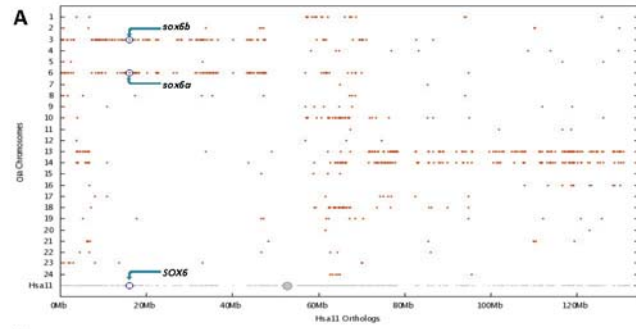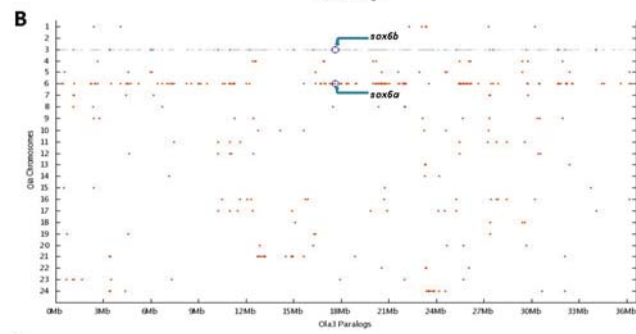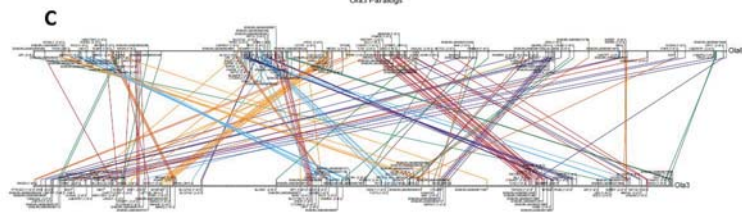

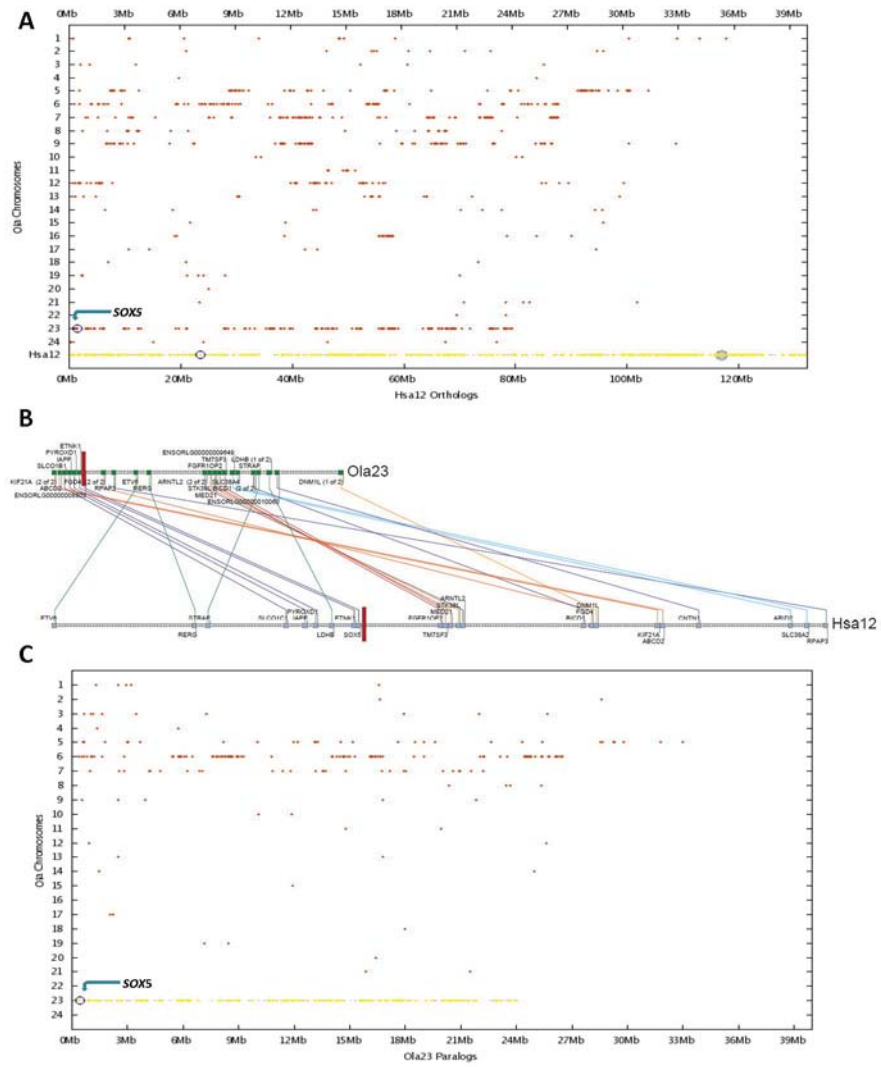

Supplement: Supplementary file 2 [file 1]
