# Supplementary material
Source: publisher figshare collection journal article supplement (https://karger.figshare.com/articles/dataset/_/5122567)
Supplement: Supplementary file 1 [file 1]

**Supplemental Table 1. RT-PCR and Real-time PCR Primers and WISH probes**

| Name            | Working ID | RT-PCR<br>Primer F/R                                  | WISH<br>probe (bp) | Real-time PCR                                   | Real-time PCR<br>production length (bp) |
|-----------------|------------|-------------------------------------------------------|--------------------|-------------------------------------------------|-----------------------------------------|
| <i>OlSox2</i>   | S02        | ACAACTCGGAGATAAGCA<br>CGGTGCTCTGGTAGTGGC              | 726                | GGAGGAAGATGGCGCAAGA<br>CGCTCTCTGACAGAAGTTTCCA   | 90                                      |
| <i>OlSox4</i>   | S04        | CAGAAAATGAGCCACACGGAGAGCA<br>GAGGACTTGACTTGAAGAGCGGGC | 554                | TGCGAGACAGCGACAAGATC<br>GCCGGATTTGACTTTCTTCCT   | 112                                     |
| <i>OlSox7</i>   | S06        | GCTCAGCAAAATGTTAGGA<br>GAAATGCCGTAGTTGTTGTA           | 975                | AATCAGCGGTGGGTTTTCC<br>CAGGCCGTACGGGTATGTGT     | 106                                     |
| <i>OlSox10b</i> | S08        | CCAAATCCGACGACGAGG<br>CGAGATGCCATAGCCGTA              | 857                | GGCTGTTCTTCCGCCAAA<br>AGCGTCCAGTCATAGCATTTC     | 98                                      |
| <i>OlSox11</i>  | S09        | CGGTGGAAGATGCTGAAG<br>AAGAGTCCAGGTCCTTATCC            | 712                | GCGAAGACTCCCAGCAAGAA<br>CTCATCGTCCGTCAGCTCACT   | 126                                     |
| <i>OlSox14</i>  | S11        | TGAAGGAGCACCCCGACT<br>GTCTTGGTCATACCTGGAAA            | 469                | GAGACCCATGAACGCCTTCA<br>GTTTGCTGATCTCCGAGTTGTG  | 95                                      |
| <i>OlSox17</i>  | S12        | GGACGCCAAAGTGAAGAACG<br>GAAACTGAGGCAGGGTGTCG          | 705                | GCTACCACGAGCACGGTTTC<br>GGGAAGGCTGTATGGTTCATAGG | 101                                     |
| <i>OlSox21</i>  | S14        | CTGGGAGCCGAATGGAAACT<br>CCCTGGGAGGAGGATGTATG          | 561                | CACAACTCCGAGATCAGCAAGA<br>CAGCCGCTTGGCTTCGT     | 92                                      |
